# Supplementary material for: The fundamental vibrational frequencies and spectroscopic constants of the C2O2H2 isomers: molecules known in simulated interstellar ice analogues
Source: Royal Society of Chemistry journal article supplement (doi:10.1039/d4cp02201g), 2024-01-01
Supplement: d4cp02201g1.pdf [file d4cp02201g1.pdf]

Cite this: DOI:00.0000/xxxxxxxxxx

## Supplementary Information for: The Fundamental Vibrational Frequencies and Spectroscopic Constants of the C<sub>2</sub>O<sub>2</sub>H<sub>2</sub> Isomers: Molecules Known in Simulated Interstellar Ice Analogues<sup>†</sup>

Alexandria G. Watrous<sup>a</sup> and Ryan C. Fortenberry<sup>\*a</sup>

Received Date

Accepted Date

DOI:00.0000/xxxxxxxxxx

### CCSD(T)-F12b/cc-pCVTZ optimized geometries (in Å) and F12-TZ dipole moment projections (in a.u. at these geometries) for:

#### *trans*-glyoxal

C -0.6424352859 0.4019125850 0.0000000000  
C 0.6424352859 -0.4019125850 0.0000000000  
O -1.7180008163 -0.1409738275 0.0000000000  
O 1.7180008163 0.1409738275 0.0000000000  
H -0.5132913333 1.4954010318 0.0000000000  
H 0.5132913333 -1.4954010318 0.0000000000

#### *cis*-glyoxal

C 0.0000000000 0.7663599838 0.5246719282  
C 0.0000000000 -0.7663599838 0.5246719282  
O 0.0000000000 1.4084991149 -0.4897529319  
O 0.0000000000 -1.4084991149 -0.4897529319  
H 0.0000000000 1.2407441956 1.5218351577  
H 0.0000000000 -1.2407441956 1.5218351577  
 $\mu$  0.0000000000 0.0000000000 1.39848436

#### *cyc*-H<sub>2</sub>COCO

O 0.0000000000 -0.0934115742 -1.4630895097  
C 0.0000000000 -0.0818693214 -0.2793384161  
O 0.0000000000 0.8014549958 0.7122692605  
C 0.0000000000 -0.6888785376 1.0314477161  
H 0.9235868722 -1.0272523093 1.4778105299  
H -0.9235868722 -1.0272523093 1.4778105299  
 $\mu$  0.0000000000 -0.70816087 1.09361051

#### OCCHOH

H -1.6132126816 -0.0409298120 -0.7925423999  
C -0.5541307570 0.0108017233 -0.5961099621  
C -0.1327592374 0.0070381275 0.6565497044  
O 0.2225260368 0.0002944791 1.7642376774

Table 1 Fermi resonances for *trans*-glyoxal

$$\begin{aligned}\omega_5 + \omega_3 &= \omega_6 + \omega_4 = \omega_7 + \omega_3 = \omega_1 \\ \omega_5 + \omega_4 &= \omega_6 + \omega_3 = \omega_2 \\ 2\omega_9 &= \omega_{10} + \omega_7 = \omega_{11} + \omega_6 = \omega_3 \\ \omega_{10} + \omega_6 &= \omega_{11} + \omega_5 = \omega_4 \\ \omega_{11} + \omega_7 &= \omega_{12} + \omega_8 = \omega_6 \\ 2\omega_{10} &= \omega_{12} + \omega_9 = \omega_7 \\ \omega_{11} + \omega_9 &= \omega_8 \\ \omega_{12} + \omega_{10} &= \omega_9\end{aligned}$$

Table 2 Coriolis resonances for *trans*-glyoxal

|        | Modes                 | Axes                        |
|--------|-----------------------|-----------------------------|
|        | $\omega_8 = \omega_7$ | A                           |
| O      | 0.3655568072          | -0.0624157886 -1.6330553958 |
| H      | 0.4636036472          | 0.8144175491 -2.0099850730  |
| $\mu$  | -0.38090045           | 0.53246562 -0.42397192      |
| HOCCOH |                       |                             |
| C      | -0.5978996172         | -0.0089982104 -0.0209759699 |
| C      | 0.5978996172          | 0.0089982104 -0.0209759699  |
| O      | -1.9190018904         | 0.0479064026 -0.0209759699  |
| O      | 1.9190018904          | -0.0479064026 -0.0209759699 |
| H      | -2.2567648023         | -0.6182156620 0.5829169478  |
| H      | 2.2567648023          | 0.6182156620 0.5829169478   |
| $\mu$  | 0.0000000000          | 0.0000000000 0.79797062     |

Table 3 Fermi resonances for *cis*-glyoxal

$$\begin{aligned}
2\omega_5 &= 2\omega_6 = \omega_1 \\
\omega_6 + \omega_5 &= \omega_2 \\
\omega_9 + \omega_8 &= \omega_{11} + \omega_6 = \omega_3 \\
2\omega_8 &= 2\omega_9 = \omega_4 \\
2\omega_{10} &= \omega_5 \\
\omega_{12} + \omega_8 &= \omega_7 \\
\omega_{12} + \omega_{10} &= \omega_9 \\
2\omega_{12} &= \omega_{11}
\end{aligned}$$

Table 4 Coriolis resonances for *cis*-glyoxal

| Modes                       | Axes |
|-----------------------------|------|
| $\omega_9 = \omega_8$       | C    |
| $\omega_{12} = \omega_{11}$ | B    |

Table 5 Fermi resonances for *cyc*-H<sub>2</sub>COCO

$$\begin{aligned}
\omega_7 + \omega_3 &= \omega_1 \\
2\omega_4 &= \omega_5 + \omega_3 = \omega_6 + \omega_3 = \omega_2 \\
2\omega_8 &= 2\omega_9 = \omega_9 + \omega_5 = \omega_9 + \omega_6 = \omega_{10} + \omega_5 = \omega_{10} + \omega_6 = \omega_3 \\
2\omega_{10} &= \omega_{10} + \omega_9 = \omega_{11} + \omega_9 = \omega_{12} + \omega_8 = \omega_4 \\
2\omega_{12} &= \omega_{11} + \omega_{10} = \omega_6 \\
\omega_{12} + \omega_{10} &= \omega_{12} + \omega_{11} = \omega_7 \\
\omega_{12} + \omega_{10} &= \omega_{12} + \omega_{11} = \omega_8 \\
2\omega_{12} &= \omega_9
\end{aligned}$$

Table 6 Coriolis resonances for *cyc*-H<sub>2</sub>COCO

| Modes                       | Axes |
|-----------------------------|------|
| $\omega_7 = \omega_5$       | A    |
| B                           |      |
| $\omega_8 = \omega_6$       | A    |
| $\omega_8 = \omega_7$       | C    |
| $\omega_9 = \omega_8$       | A    |
| $\omega_{11} = \omega_{10}$ | C    |
| $\omega_{12} = \omega_{11}$ | A    |

Table 7 Fermi resonances for OCCHOH

$$\begin{aligned}
\omega_6 + \omega_3 &= \omega_2 \\
2\omega_7 &= \omega_7 + \omega_5 = \omega_7 + \omega_6 = \omega_9 + \omega_4 = \omega_3 \\
2\omega_8 &= \omega_{11} + \omega_5 = \omega_{11} + \omega_6 = \omega_{11} + \omega_7 = \omega_4 \\
2\omega_9 &= \omega_9 + \omega_8 = \omega_{11} + \omega_7 = \omega_{12} + \omega_6 = \omega_{12} + \omega_7 = \omega_5 \\
2\omega_8 &= 2\omega_9 = \omega_{10} + \omega_9 = \omega_{11} + \omega_7 = \omega_6 \\
2\omega_{10} &= \omega_{10} + \omega_9 = \omega_{11} + \omega_8 = \omega_{11} + \omega_9 = \omega_{12} + \omega_8 = \omega_7 \\
2\omega_{11} &= \omega_{11} + \omega_9 = \omega_{12} + \omega_9 = \omega_{12} + \omega_{11} = \omega_8 \\
2\omega_{11} &= \omega_{12} + \omega_{11} = \omega_9 \\
2\omega_{11} &= \omega_{10} \\
2\omega_{12} &= \omega_{11}
\end{aligned}$$

Table 8 Coriolis resonances for OCCHOH

| Modes                    | Axes |
|--------------------------|------|
| $\omega_7 = \omega_6$    | C    |
| $\omega_9 = \omega_8$    | A    |
| B                        |      |
| $\omega_{10} = \omega_8$ | A    |

Table 9 Fermi resonances for HOCCOH

$$\begin{aligned}
2\omega_5 &= 2\omega_6 = \omega_6 + \omega_4 = \omega_3 \\
2\omega_8 &= 2\omega_9 = \omega_7 \\
2\omega_{12} &= \omega_{11} + \omega_{10} = \omega_8 \\
2\omega_{11} &= \omega_{10}
\end{aligned}$$

Table 10 Coriolis resonances for HOCCOH

| Modes                       | Axes |
|-----------------------------|------|
| $\omega_9 = \omega_8$       | A    |
| $\omega_{11} = \omega_9$    | A    |
| $\omega_{12} = \omega_8$    | A    |
| $\omega_{12} = \omega_{11}$ | A    |

Table 11 Rotational Constants of *trans*-glyoxal

| Const.          | Units | TcCR    | TcCR+DZ |
|-----------------|-------|---------|---------|
| A <sub>1</sub>  | MHz   | 55105.5 | 55089.9 |
| B <sub>1</sub>  | MHz   | 4794.7  | 4794.3  |
| C <sub>1</sub>  | MHz   | 4412.7  | 4412.2  |
| A <sub>2</sub>  | MHz   | 55083.4 | 55067.8 |
| B <sub>2</sub>  | MHz   | 4794.9  | 4794.5  |
| C <sub>2</sub>  | MHz   | 4412.7  | 4412.2  |
| A <sub>3</sub>  | MHz   | 55188.8 | 55176.1 |
| B <sub>3</sub>  | MHz   | 4786.7  | 4786.2  |
| C <sub>3</sub>  | MHz   | 4405.9  | 4405.4  |
| A <sub>4</sub>  | MHz   | 55227.1 | 55215.7 |
| B <sub>4</sub>  | MHz   | 4783.2  | 4782.7  |
| C <sub>4</sub>  | MHz   | 4403.4  | 4402.9  |
| A <sub>5</sub>  | MHz   | 55308.5 | 55296.2 |
| B <sub>5</sub>  | MHz   | 4804.7  | 4804.3  |
| C <sub>5</sub>  | MHz   | 4415.4  | 4415.0  |
| A <sub>6</sub>  | MHz   | 55264.8 | 55252.3 |
| B <sub>6</sub>  | MHz   | 4805.6  | 4805.2  |
| C <sub>6</sub>  | MHz   | 4415.7  | 4415.2  |
| A <sub>7</sub>  | MHz   | 55345.1 | 55333.2 |
| B <sub>7</sub>  | MHz   | 4779.9  | 4779.3  |
| C <sub>7</sub>  | MHz   | 4395.3  | 4394.7  |
| A <sub>8</sub>  | MHz   | 55061.7 | 55049.8 |
| B <sub>8</sub>  | MHz   | 4790.0  | 4789.7  |
| C <sub>8</sub>  | MHz   | 4416.9  | 4416.6  |
| A <sub>9</sub>  | MHz   | 55285.4 | 55273.1 |
| B <sub>9</sub>  | MHz   | 4788.9  | 4788.5  |
| C <sub>9</sub>  | MHz   | 4415.3  | 4414.8  |
| A <sub>10</sub> | MHz   | 55353.6 | 55342.2 |
| B <sub>10</sub> | MHz   | 4790.2  | 4789.6  |
| C <sub>10</sub> | MHz   | 4407.0  | 4406.5  |
| A <sub>11</sub> | MHz   | 57034.4 | 57023.6 |
| B <sub>11</sub> | MHz   | 4804.5  | 4804.1  |
| C <sub>11</sub> | MHz   | 4415.0  | 4414.5  |
| A <sub>12</sub> | MHz   | 53191.0 | 53181.4 |
| B <sub>12</sub> | MHz   | 4811.8  | 4811.2  |
| C <sub>12</sub> | MHz   | 4442.1  | 4441.5  |

Table 12 Rotational Constants for *cis*-glyoxal

| Const.          | Units | TcCR    | TcCR+DZ |
|-----------------|-------|---------|---------|
| A <sub>1</sub>  | MHz   | 26761.8 | 26740.1 |
| B <sub>1</sub>  | MHz   | 6164.5  | 6170.0  |
| C <sub>1</sub>  | MHz   | 5018.7  | 5021.5  |
| A <sub>2</sub>  | MHz   | 26780.2 | 26758.6 |
| B <sub>2</sub>  | MHz   | 6162.8  | 6168.3  |
| C <sub>2</sub>  | MHz   | 5017.8  | 5020.6  |
| A <sub>3</sub>  | MHz   | 26632.6 | 26611.3 |
| B <sub>3</sub>  | MHz   | 6181.3  | 6186.9  |
| C <sub>3</sub>  | MHz   | 5024.7  | 5027.6  |
| A <sub>4</sub>  | MHz   | 26620.1 | 26597.0 |
| B <sub>4</sub>  | MHz   | 6174.9  | 6180.7  |
| C <sub>4</sub>  | MHz   | 5018.9  | 5021.9  |
| A <sub>5</sub>  | MHz   | 26736.9 | 26714.5 |
| B <sub>5</sub>  | MHz   | 6194.8  | 6200.9  |
| C <sub>5</sub>  | MHz   | 5031.9  | 5035.1  |
| A <sub>6</sub>  | MHz   | 26707.5 | 26684.6 |
| B <sub>6</sub>  | MHz   | 6202.7  | 6208.8  |
| C <sub>6</sub>  | MHz   | 5028.4  | 5031.5  |
| A <sub>7</sub>  | MHz   | 26688.8 | 26661.6 |
| B <sub>7</sub>  | MHz   | 6175.8  | 6183.2  |
| C <sub>7</sub>  | MHz   | 5032.5  | 5036.5  |
| A <sub>8</sub>  | MHz   | 26809.1 | 26788.0 |
| B <sub>8</sub>  | MHz   | 6143.2  | 6148.6  |
| C <sub>8</sub>  | MHz   | 4999.4  | 5002.1  |
| A <sub>9</sub>  | MHz   | 26783.3 | 26760.3 |
| B <sub>9</sub>  | MHz   | 6186.4  | 6192.7  |
| C <sub>9</sub>  | MHz   | 5024.5  | 5027.8  |
| A <sub>10</sub> | MHz   | 26716.7 | 26693.2 |
| B <sub>10</sub> | MHz   | 6165.9  | 6172.2  |
| C <sub>10</sub> | MHz   | 5028.1  | 5031.5  |
| A <sub>11</sub> | MHz   | 26960.4 | 26935.8 |
| B <sub>11</sub> | MHz   | 6169.2  | 6176.0  |
| C <sub>11</sub> | MHz   | 5017.6  | 5021.2  |
| A <sub>12</sub> | MHz   | 27069.4 | 27033.3 |
| B <sub>12</sub> | MHz   | 6111.1  | 6122.3  |
| C <sub>12</sub> | MHz   | 5030.9  | 5037.0  |

Table 13 Rotational Constants of *cyc*-H<sub>2</sub>COCO

| Const.          | Units | TcCR    |
|-----------------|-------|---------|
| A <sub>1</sub>  | MHz   | 24931.6 |
| B <sub>1</sub>  | MHz   | 8090.5  |
| C <sub>1</sub>  | MHz   | 6368.7  |
| A <sub>2</sub>  | MHz   | 24904.9 |
| B <sub>2</sub>  | MHz   | 8091.3  |
| C <sub>2</sub>  | MHz   | 6369.8  |
| A <sub>3</sub>  | MHz   | 24878.9 |
| B <sub>3</sub>  | MHz   | 8052.8  |
| C <sub>3</sub>  | MHz   | 6340.8  |
| A <sub>4</sub>  | MHz   | 24872.4 |
| B <sub>4</sub>  | MHz   | 8103.2  |
| C <sub>4</sub>  | MHz   | 6383.2  |
| A <sub>5</sub>  | MHz   | 24933.0 |
| B <sub>5</sub>  | MHz   | 8093.2  |
| C <sub>5</sub>  | MHz   | 6357.2  |
| A <sub>6</sub>  | MHz   | 24836.4 |
| B <sub>6</sub>  | MHz   | 8093.2  |
| C <sub>6</sub>  | MHz   | 6357.7  |
| A <sub>7</sub>  | MHz   | 24710.9 |
| B <sub>7</sub>  | MHz   | 8116.4  |
| C <sub>7</sub>  | MHz   | 6371.5  |
| A <sub>8</sub>  | MHz   | 24917.3 |
| B <sub>8</sub>  | MHz   | 8093.5  |
| C <sub>8</sub>  | MHz   | 6370.4  |
| A <sub>9</sub>  | MHz   | 24918.7 |
| B <sub>9</sub>  | MHz   | 8083.3  |
| C <sub>9</sub>  | MHz   | 6360.8  |
| A <sub>10</sub> | MHz   | 24627.2 |
| B <sub>10</sub> | MHz   | 8127.3  |
| C <sub>10</sub> | MHz   | 6354.8  |
| A <sub>11</sub> | MHz   | 24965.1 |
| B <sub>11</sub> | MHz   | 8112.8  |
| C <sub>11</sub> | MHz   | 6369.8  |
| A <sub>12</sub> | MHz   | 24839.6 |
| B <sub>12</sub> | MHz   | 8113.2  |
| C <sub>12</sub> | MHz   | 6383.0  |

Table 14 Rotational Constants of OCCHOH

| Const.          | Units | TcCR    | TcCR+DZ |
|-----------------|-------|---------|---------|
| A <sub>1</sub>  | MHz   | 48878.6 | 48706.7 |
| B <sub>1</sub>  | MHz   | 4680.1  | 4685.4  |
| C <sub>1</sub>  | MHz   | 4318.4  | 4321.8  |
| A <sub>2</sub>  | MHz   | 49510.7 | 49339.2 |
| B <sub>2</sub>  | MHz   | 4662.1  | 4667.4  |
| C <sub>2</sub>  | MHz   | 4306.3  | 4309.6  |
| A <sub>3</sub>  | MHz   | 48996.1 | 48824.9 |
| B <sub>3</sub>  | MHz   | 4654.8  | 4659.9  |
| C <sub>3</sub>  | MHz   | 4296.1  | 4299.2  |
| A <sub>4</sub>  | MHz   | 48459.6 | 48277.5 |
| B <sub>4</sub>  | MHz   | 4684.3  | 4689.8  |
| C <sub>4</sub>  | MHz   | 4315.4  | 4318.8  |
| A <sub>5</sub>  | MHz   | 49175.9 | 48999.7 |
| B <sub>5</sub>  | MHz   | 4680.1  | 4685.7  |
| C <sub>5</sub>  | MHz   | 4318.1  | 4321.5  |
| A <sub>6</sub>  | MHz   | 48353.9 | 48159.5 |
| B <sub>6</sub>  | MHz   | 4691.2  | 4697.1  |
| C <sub>6</sub>  | MHz   | 4320.3  | 4324.0  |
| A <sub>7</sub>  | MHz   | 49416.8 | 49243.0 |
| B <sub>7</sub>  | MHz   | 4662.7  | 4668.1  |
| C <sub>7</sub>  | MHz   | 4303.0  | 4306.3  |
| A <sub>8</sub>  | MHz   | 49771.3 | 49595.3 |
| B <sub>8</sub>  | MHz   | 4674.6  | 4680.3  |
| C <sub>8</sub>  | MHz   | 4313.3  | 4316.9  |
| A <sub>9</sub>  | MHz   | 49071.3 | 48885.2 |
| B <sub>9</sub>  | MHz   | 4669.9  | 4675.9  |
| C <sub>9</sub>  | MHz   | 4315.8  | 4319.6  |
| A <sub>10</sub> | MHz   | 48993.6 | 48765.8 |
| B <sub>10</sub> | MHz   | 4680.0  | 4687.2  |
| C <sub>10</sub> | MHz   | 4322.4  | 4326.9  |
| A <sub>11</sub> | MHz   | 49947.8 | 49700.0 |
| B <sub>11</sub> | MHz   | 4668.2  | 4675.8  |
| C <sub>11</sub> | MHz   | 4306.5  | 4311.2  |
| A <sub>12</sub> | MHz   | 49340.3 | 49079.6 |
| B <sub>12</sub> | MHz   | 4699.6  | 4707.9  |
| C <sub>12</sub> | MHz   | 4326.1  | 4331.3  |

Table 15 Rotational Constants of HOCCOH

| Const.          | Units | TcCR     | TcCR+DZ  |
|-----------------|-------|----------|----------|
| A <sub>1</sub>  | MHz   | 317178.4 | 317119.5 |
| B <sub>1</sub>  | MHz   | 3674.7   | 3675.9   |
| C <sub>1</sub>  | MHz   | 3664.9   | 3665.6   |
| A <sub>2</sub>  | MHz   | 317211.3 | 317174.6 |
| B <sub>2</sub>  | MHz   | 3674.7   | 3675.9   |
| C <sub>2</sub>  | MHz   | 3664.8   | 3665.5   |
| A <sub>3</sub>  | MHz   | 324037.6 | 324052.4 |
| B <sub>3</sub>  | MHz   | 3656.3   | 3657.3   |
| C <sub>3</sub>  | MHz   | 3646.6   | 3647.1   |
| A <sub>4</sub>  | MHz   | 324836.3 | 324813.2 |
| B <sub>4</sub>  | MHz   | 3665.5   | 3666.6   |
| C <sub>4</sub>  | MHz   | 3656.0   | 3656.6   |
| A <sub>5</sub>  | MHz   | 331974.6 | 332026.9 |
| B <sub>5</sub>  | MHz   | 3675.2   | 3676.4   |
| C <sub>5</sub>  | MHz   | 3664.8   | 3665.6   |
| A <sub>6</sub>  | MHz   | 330702.4 | 330724.4 |
| B <sub>6</sub>  | MHz   | 3668.7   | 3669.9   |
| C <sub>6</sub>  | MHz   | 3658.4   | 3659.1   |
| A <sub>7</sub>  | MHz   | 323685.1 | 323685.3 |
| B <sub>7</sub>  | MHz   | 3668.9   | 3670.1   |
| C <sub>7</sub>  | MHz   | 3659.1   | 3659.8   |
| A <sub>8</sub>  | MHz   | 322066.2 | 321978.1 |
| B <sub>8</sub>  | MHz   | 3684.6   | 3686.4   |
| C <sub>8</sub>  | MHz   | 3674.3   | 3675.5   |
| A <sub>9</sub>  | MHz   | 322144.9 | 322176.4 |
| B <sub>9</sub>  | MHz   | 3684.6   | 3686.2   |
| C <sub>9</sub>  | MHz   | 3674.9   | 3676.0   |
| A <sub>10</sub> | MHz   | 326103.9 | 326211.4 |
| B <sub>10</sub> | MHz   | 3675.0   | 3676.5   |
| C <sub>10</sub> | MHz   | 3663.2   | 3664.1   |
| A <sub>11</sub> | MHz   | 327098.3 | 327045.1 |
| B <sub>11</sub> | MHz   | 3684.7   | 3686.3   |
| C <sub>11</sub> | MHz   | 3676.6   | 3677.7   |
| A <sub>12</sub> | MHz   | 321002.2 | 321025.5 |
| B <sub>12</sub> | MHz   | 3686.1   | 3687.7   |
| C <sub>12</sub> | MHz   | 3675.4   | 3676.4   |
